# Supplementary material for: NaYF4 nanocrystals with TOPO ligands: synthesis-dependent structural and luminescent properties
Source: Royal Society of Chemistry journal article supplement (doi:10.1039/c3cp52865k), 2013-01-01
Supplement: c3cp52865k.pdf [file c3cp52865k.pdf]

## Supporting Information

# NaYF<sub>4</sub> nanocrystals with TOPO ligands: synthesis-dependent structural and luminescent properties

Mateusz Banski,<sup>a</sup> Artur Podhorodecki<sup>\*a</sup> and Jan Misiewicz<sup>a</sup>

<sup>a</sup> Institute of Physics, Wrocław University of Technology, Wybrzeże Wyspińskiego 27, 50-370

Wrocław, Poland

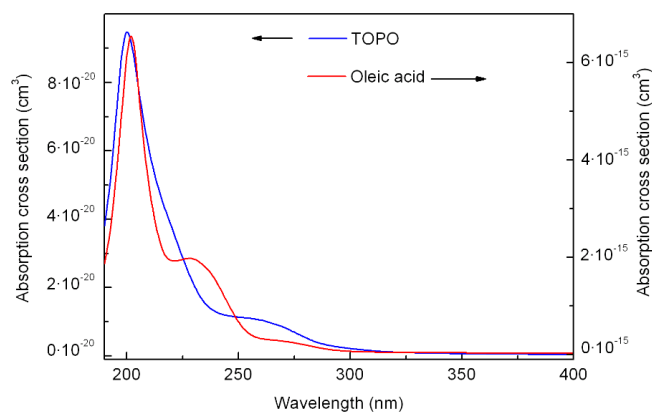

**Fig. S1** Absorption cross section spectra of ligands molecules TOPO and oleic acid.

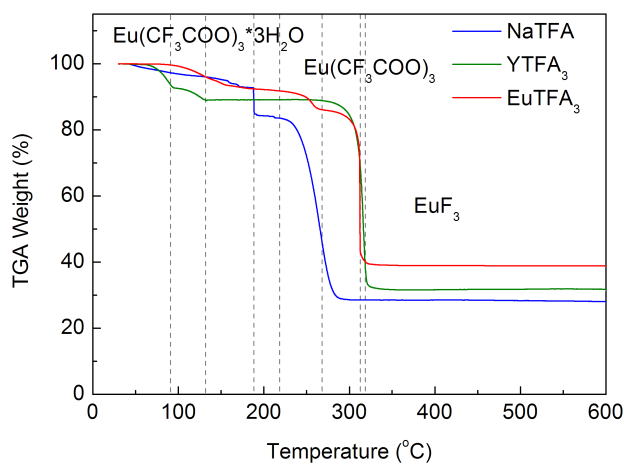

**Fig. S2** TGA curves of Na, Y and Eu TFA salts used as a precursors in NaYF<sub>4</sub> nanocrystal synthesis. The products of thermal decompositions determined on TGA curves are indicated in the figure.

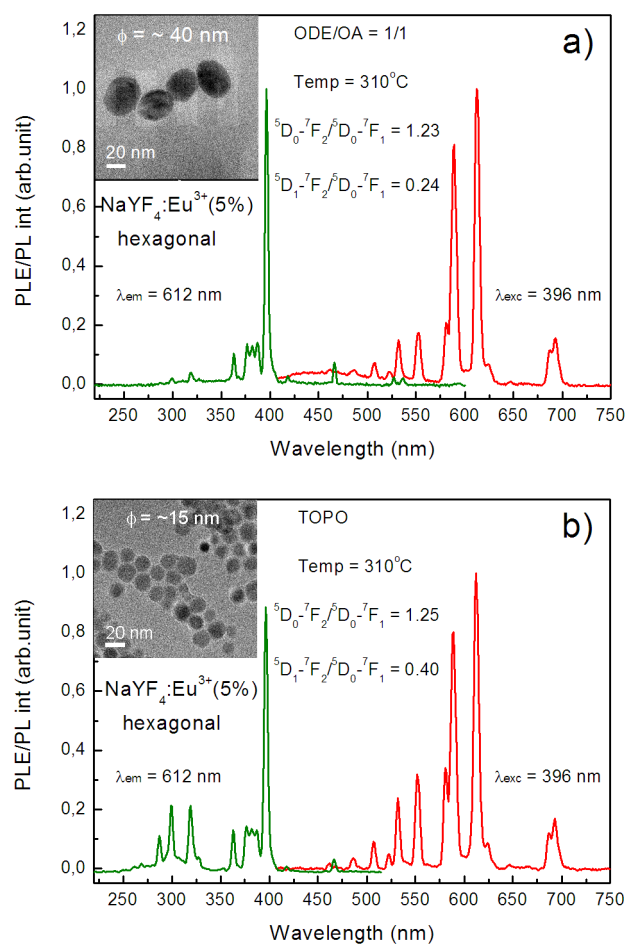

**Fig. S3** PLE and PL spectra of NaYF<sub>4</sub>:Eu<sup>3+</sup> NCs synthesized in a) OA/ODE mixture and b) TOPO. Insets show the TEM images of NCs.

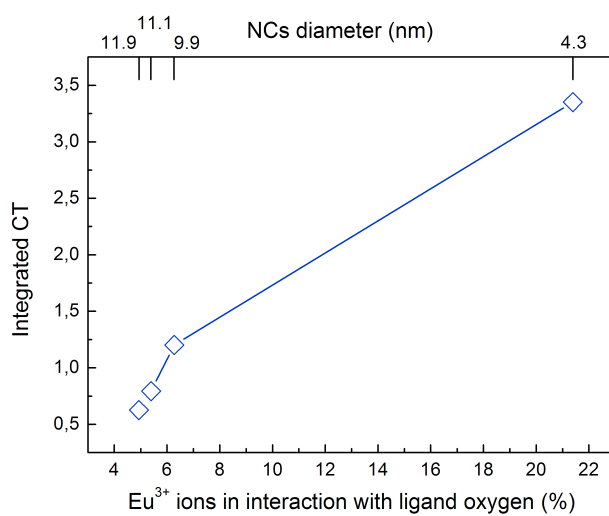

**Fig. S4** The relation between the integrated intensity of CT absorption band and percentage of  $\text{Eu}^{3+}$  bound to oxygen from the surface ligands.

**Table S1** NaTFA and YTFA<sub>3</sub> precursors composition ratio in set of NaYF<sub>4</sub> NCs.

| $\text{Na}^+$ | $\text{Y}^{3+}$ | $\text{Eu}^{3+}$ | $\text{Na}^+/\text{Y}^{3+}$ | $\text{Y}^{3+}$   | $\text{F}^-/\text{Y}^{3+}$ |
|---------------|-----------------|------------------|-----------------------------|-------------------|----------------------------|
| [mmol]        | [mmol]          | [mmol]           |                             | % of total cation |                            |
| 0.50          | 0.475           | 0.025            | 1.00                        | 50                | 4.00                       |
| 0.75          | 0.475           | 0.025            | 1.50                        | 40                | 4.50                       |
| 1.00          | 0.475           | 0.025            | 2.00                        | 33                | 5.00                       |
| 1.25          | 0.475           | 0.025            | 2.50                        | 28                | 5.50                       |
